# Supplementary material for: Definitions of and Perspectives on Forests of High Value: A Systematic Map Protocol
Source: MDPI journal article supplement (doi:10.3390/f12070876), 2021-07-02
Supplement: s1 [file s1]

## List of articles used to test the performance of the search

- [1] P. Potapov et al., "The last frontiers of wilderness: Tracking loss of intact forest landscapes from 2000 to 2013," *Sci. Adv.*, vol. 3, no. 1, Jan. 2017, doi: 10.1126/sciadv.1600821.
- [2] B. Haurez et al., "A look at Intact Forest Landscapes (IFLs) and their relevance in Central African forest policy," *Forest Policy and Economics*, vol. 80. Elsevier B.V., pp. 192–199, 01-Jul-2017, doi: 10.1016/j.forpol.2017.03.021.
- [3] R. J. Keenan, G. A. Reams, F. Achard, J. V. de Freitas, A. Grainger, and E. Lindquist, "Dynamics of global forest area: Results from the FAO Global Forest Resources Assessment 2015," *Forest Ecology and Management*, vol. 352. Elsevier B.V., pp. 9–20, 08-Sep-2015, doi: 10.1016/j.foreco.2015.06.014.
- [4] A. Altamirano, P. Aplin, A. Miranda, L. Cayuela, A. C. Algar, and R. Field, "High rates of forest loss and turnover obscured by classical landscape measures," *Appl. Geogr.*, vol. 40, pp. 199–211, Jun. 2013, doi: 10.1016/j.apgeog.2013.03.003.
- [5] K. M. Brauner et al., "Global screening for Critical Habitat in the terrestrial realm," 2018, doi: 10.1371/journal.pone.0193102.
- [6] D. Brugiére and R. Kormos, "Review of the protected area network in Guinea, West Africa, and recommendations for new sites for biodiversity conservation," *Biodiversity and Conservation*, vol. 18, no. 4. Springer, pp. 847–868, 07-Apr-2009, doi: 10.1007/s10531-008-9508-z.
- [7] A. A. Ormsby and S. A. Bhagwat, "Sacred forests of India: A strong tradition of community-based natural resource management," *Environ. Conserv.*, vol. 37, no. 3, pp. 320–326, Sep. 2010, doi: 10.1017/S0376892910000561.
- [8] B. A. Margono, P. V. Potapov, S. Turubanova, F. Stolle, and M. C. Hansen, "Primary forest cover loss in Indonesia over 2000–2012," *Nat. Clim. Chang.*, vol. 4, no. 8, pp. 730–735, 2014, doi: 10.1038/nclimate2277.
- [9] A. Tyukavina, M. C. Hansen, P. V. Potapov, A. M. Krylov, and S. J. Goetz, "Pan-tropical hinterland forests: Mapping minimally disturbed forests," *Glob. Ecol. Biogeogr.*, vol. 25, no. 2, pp. 151–163, 2016, doi: 10.1111/geb.12394.
- [10] L. Bergès and J. L. Dupouey, "Historical ecology and ancient forests: Progress, conservation issues and scientific prospects, with some examples from the French case," *J. Veg. Sci.*, 2019, doi: 10.1111/jvs.12846.
- [11] C. Wirth, C. Messier, Y. Bergeron, D. Frank, and A. Fankhänel, "Old-Growth Forest Definitions: a Pragmatic View," Springer, Berlin, Heidelberg, 2009, pp. 11–33.
- [12] I. Gjerde, M. Saetersdal, and H. H. Blom, "Complementary Hotspot Inventory-A method for identification of important areas for biodiversity at the forest stand level," 2007, doi: 10.1016/j.biocon.2007.03.007.
- [13] A. J. Hansen et al., "A policy-driven framework for conserving the best of Earth's remaining moist tropical forests," *Nat. Ecol. Evol.*, vol. 4, no. 10, pp. 1377–1384, 2020, doi: 10.1038/s41559-020-1274-7.
- [14] D. Morales-Hidalgo, S. N. Oswalt, and E. Somanathan, "Status and trends in global primary forest, protected areas, and areas designated for conservation of biodiversity from the Global Forest Resources Assessment 2015," *For. Ecol. Manage.*, vol. 352, pp. 68–77, 2015, doi:

10.1016/j.foreco.2015.06.011.

- [15] F. M. Sabatini et al., "Where are Europe's last primary forests?," *Divers. Distrib.*, vol. 24, no. 10, pp. 1426–1439, 2018, doi: 10.1111/ddi.12778.
- [16] T. Loivaranta, "Post-human landscapes of Indigenous community forests in Central India," *Geogr. J.*, vol. 186, no. 3, pp. 288–299, Sep. 2020, doi: 10.1111/geoj.12342.
- [17] T. D. Allendorf, J. S. Brandt, and J. M. Yang, "Local perceptions of Tibetan village sacred forests in northwest Yunnan," *Biol. Conserv.*, vol. 169, pp. 303–310, Jan. 2014, doi: 10.1016/j.biocon.2013.12.001.
- [18] N. C. González and M. Kröger, "The potential of Amazon indigenous agroforestry practices and ontologies for rethinking global forest governance," *For. Policy Econ.*, vol. 118, p. 102257, Sep. 2020, doi: 10.1016/j.forpol.2020.102257.
- [19] M. F. Abdullah, A. Othman, R. Jani, C. V. Bartholomew, E. Pesiu, and M. T. Abdullah, "TRADITIONAL KNOWLEDGE AND THE USES OF NATURAL RESOURCES BY THE RESETTLEMENT OF INDIGENOUS PEOPLE IN MALAYSIA," *J. Southeast Asian Stud.*, vol. 25, no. 1, pp. 168–190, Jun. 2020, doi: 10.22452/jati.vol25no1.9.
- [20] A. L. Booth and N. W. Skelton, "'There's a conflict right there': Integrating indigenous community values into commercial forestry in the Tl'azt'en First Nation," *Soc. Nat. Resour.*, vol. 24, no. 4, pp. 368–383, Apr. 2011, doi: 10.1080/08941920902755390.
